# Supplementary material
Source: publisher figshare collection journal article supplement (https://acs.figshare.com/ndownloader/files/4530673)
Supplement: Supplementary file 1 [file 4530673]

## SUPPLEMENTAL INFORMATION

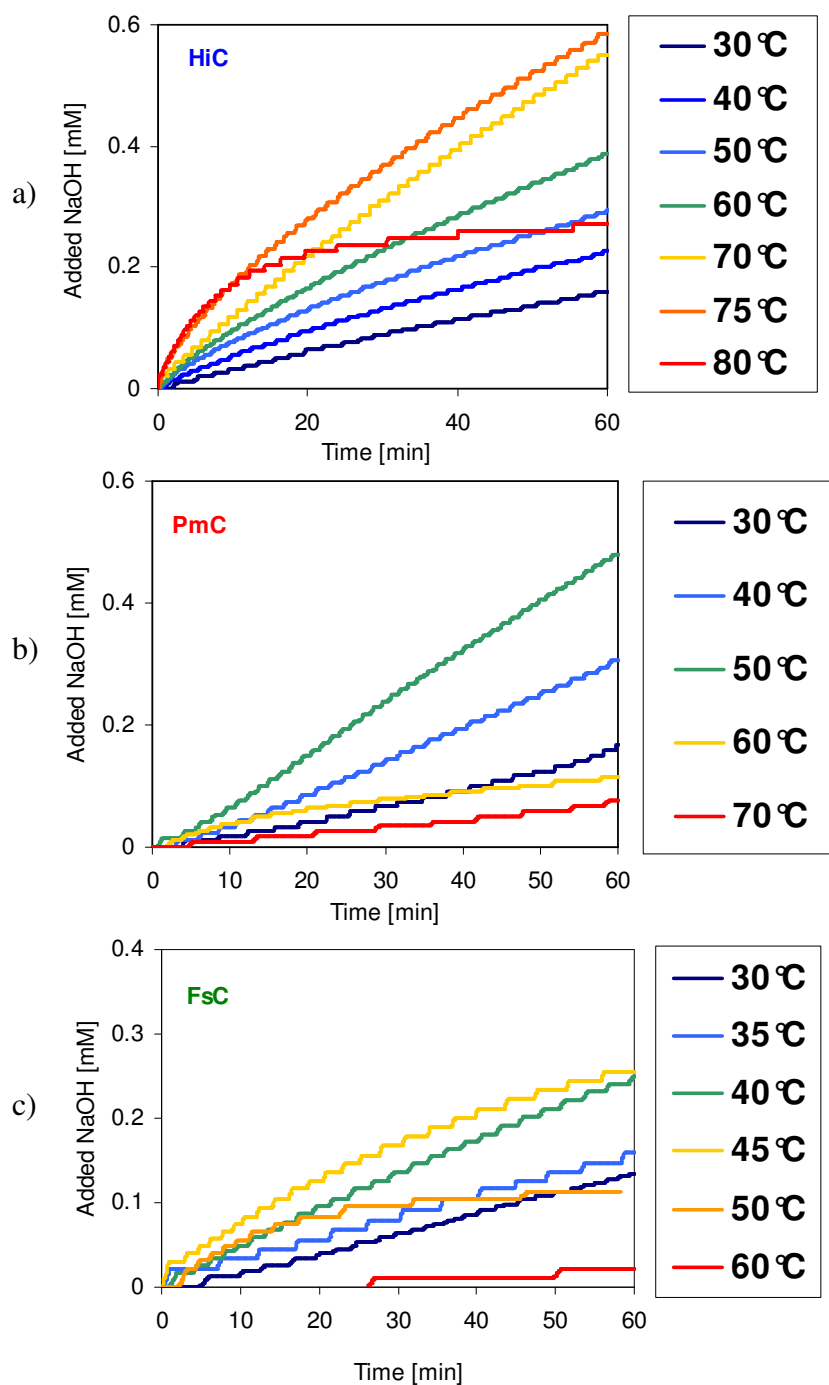

**S 1.** Titration plots versus time generated by pH-stat measurements to determine initial activity of cutinases for PVAc hydrolysis as a function of temperature. Experiments were performed using 10 mM NaOH as titrant, 8 m<sup>2</sup>/mL PVAc, and 0.5 nmole/mL of either a) HiC, b) PmC or c) FsC.

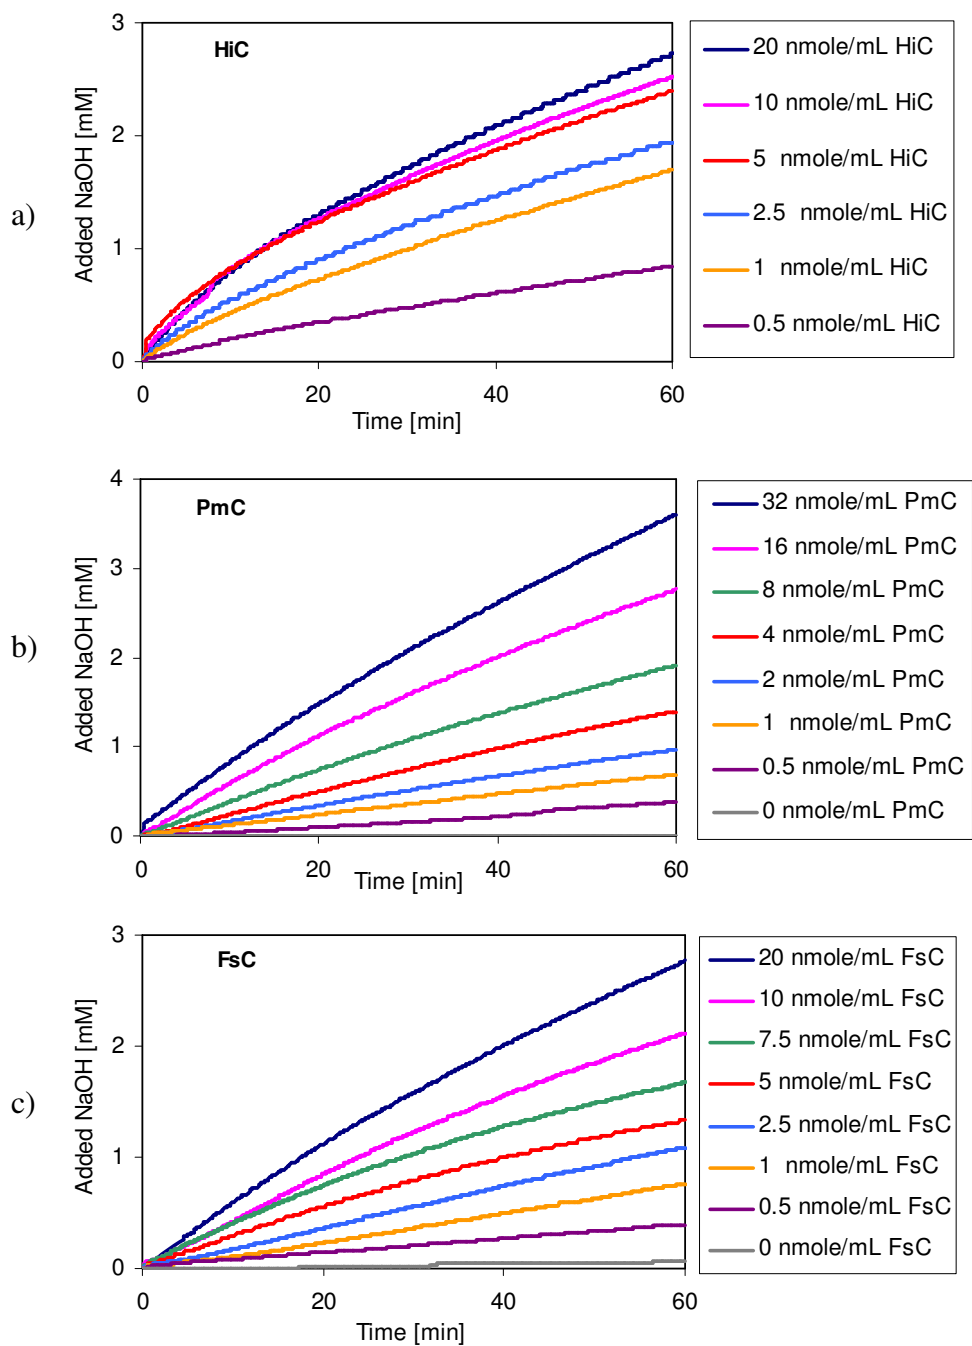

**S2.** Titration plots versus time generated by pH-stat measurements to determine initial activity of a) HiC, b) PmC and c) FsC as a function of their concentration. Experiments were conducted with constant PVAc concentration (20 m<sup>2</sup>/ml) for HiC, PmC and FsC at 70, 50 and 40 °C, respectively.

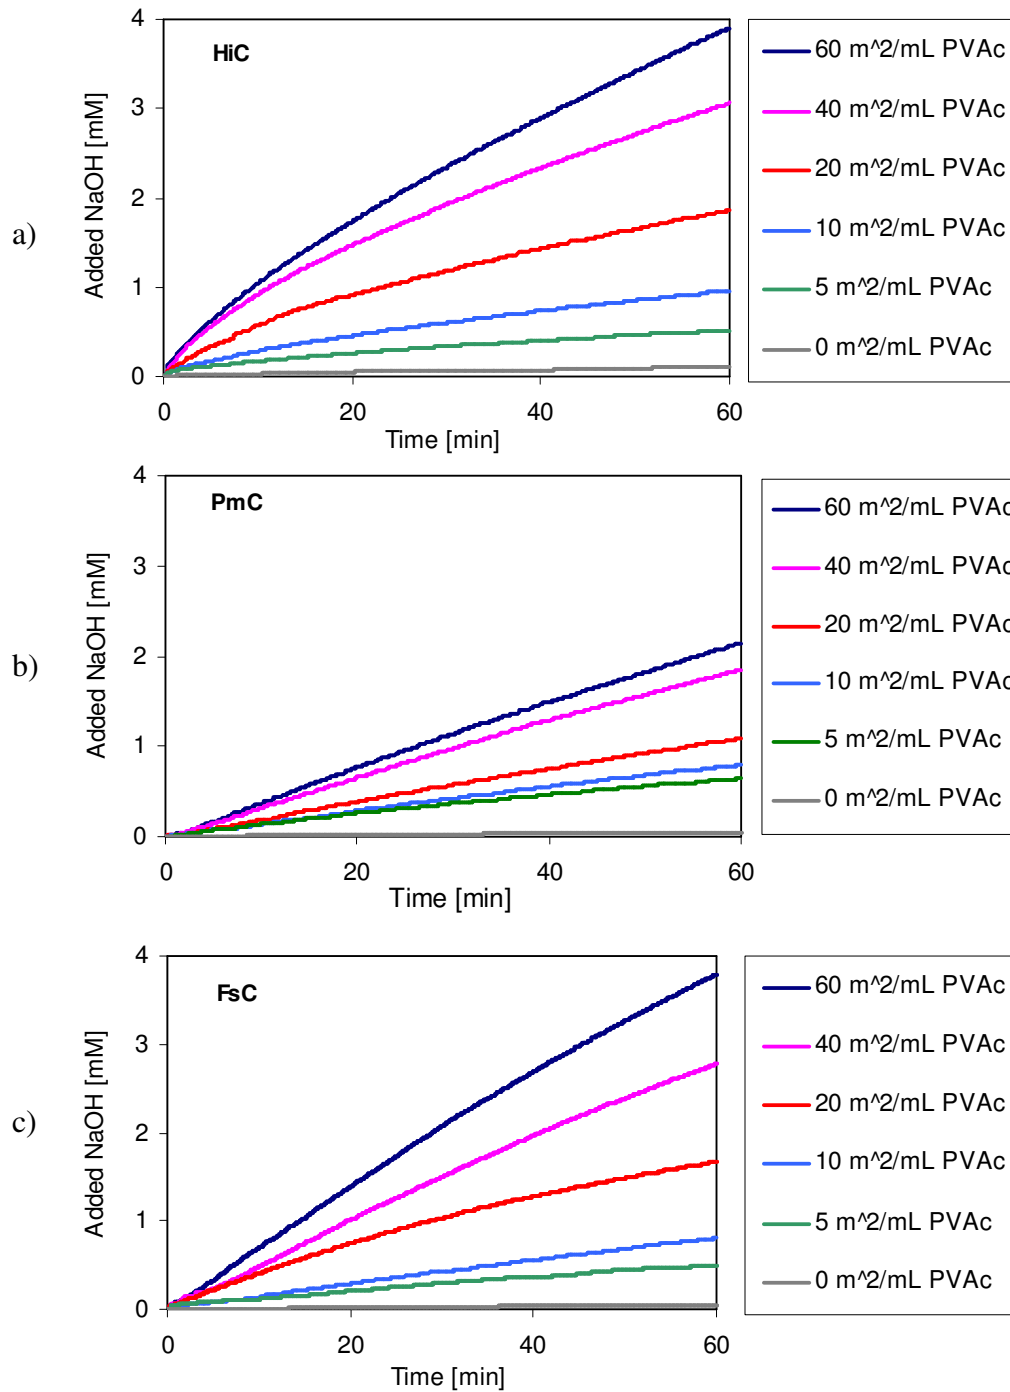

**S3.** Titration plots versus time generated by pH-stat measurements to determine initial activity of cutinases as a function of PVAc concentration. Experiments were performed with fixed enzyme concentration: a) 1.0 nmole/mL HiC at 70 °C, b) 2.0 nmole/mL PmC at 50 °C and c) 4.3 nmole/mL FsC at 40 °C.
